1 **TITLE:** Recombinant expression in *E. coli* of human FGFR2 with its transmembrane and  
2 extracellular domains

3

4 Authors: Adam Bajinting<sup>1,2</sup>, Ho Leung Ng<sup>1,3</sup>

5 <sup>1</sup>University of Hawaii at Manoa, Department of Chemistry

6 <sup>2</sup>St. Louis University, School of Medicine

7 <sup>3</sup>University of Hawaii Cancer Center

8

9 Corresponding author: Ho Leung Ng, hng@hawaii.edu

10

11 **ABSTRACT**

12 Fibroblast growth factor receptors (FGFRs) are a family of receptor tyrosine kinases  
13 containing three domains: an extracellular receptor domain, a single transmembrane helix, and an  
14 intracellular tyrosine kinase domain. FGFRs are activated by fibroblast growth factors (FGFs) as  
15 part of complex signal transduction cascades regulating angiogenesis, skeletal formation, cell  
16 differentiation, proliferation, cell survival, and cancer. We have developed the first recombinant  
17 expression system in *E. coli* to produce a construct of human FGFR2 containing its  
18 transmembrane and extracellular receptor domains. We demonstrate that the expressed construct  
19 is functional in binding heparin and dimerizing. Size exclusion chromatography demonstrates  
20 that the purified FGFR2 does not form a complex with FGF1 or adopts an inactive dimer  
21 conformation. Progress towards the successful recombinant production of intact FGFRs will  
22 facilitate further biochemical experiments and structure determination that will provide insight  
23 into how extracellular FGF binding activates intracellular kinase activity.

24

25 Keywords: FGFR, fibroblast growth factor receptor, membrane protein expression, receptor  
26 tyrosine kinases, FGF, FGFR2, recombinant expression

27

## 1 INTRODUCTION

2 As receptor tyrosine kinases (RTKs), FGFRs have three primary domains: an  
3 extracellular domain (ECD), a single transmembrane helix (TM), and an intracellular tyrosine  
4 kinase domain (KD) (**Fig. 1**). These proteins are expressed primarily in endothelial, fibroblast,  
5 vascular smooth muscle, neuroectodermal, and mesenchymal cells. When activated by fibroblast  
6 growth factors (FGFs), these receptors are responsible for activating mechanisms via trans-  
7 autophosphorylation that result in angiogenesis, skeletal formation, and cell differentiation,  
8 proliferation, survival, and growth. Within the subfamily are four types of FGFRs: FGFR1,  
9 FGFR2, FGFR3, and FGFR4, which share 55-72% sequence homology. Due to their critical  
10 roles in cell and tissue development, mutations of FGFRs are known to lead to achondroplasia  
11 (poor cartilage growth) and developmental disorders that exhibit craniosynostosis (improper  
12 skull formation) (Turner & Grose, 2010). FGFR2 and FGFR3 have also been implicated in  
13 cancers such as bladder cancer, and inhibitors are being investigated as potential cancer  
14 therapeutics (Turner & Grose, 2010; Brooks, Kilgour & Smith, 2012; Daniele et al., 2012; Dieci  
15 et al., 2013).

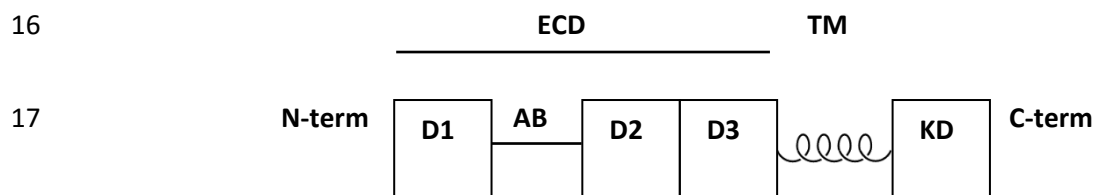

19 **Fig. 1. Schematic of domains and motifs in FGFR2.** D1-D3 are the immunoglobulin  
20 domains. AB is the acid box motif. ECD is the extracellular domain (or ectodomain). TM  
21 is the single transmembrane helix. KD is the intracellular kinase domain.

1           Crystal structures have been determined of the ectodomains and kinase domains of the  
2 FGFRs (Mohammadi, Schlessinger & Hubbard, 1996; Plotnikov et al., 1999, 2000; Schlessinger  
3 et al., 2000; Yeh et al., 2002; Zhang et al., 2009). The ectodomain is composed of three  
4 immunoglobulin (Ig) domains termed D1, D2, and D3. Between D1 and D2 is an acid box motif,  
5 a sequence of 20 acid-rich amino acids that binds to divalent cations to stabilize the interaction  
6 between FGFR and heparin/heparin sulfate proteoglycans (HSPGs) (Patstone & Maher, 1996).  
7 The acid box also mediates interactions with other proteins (Sanchez-Heras et al., 2006, p.) and  
8 plays a key role in auto-inhibition (Kalinina et al., 2012). For the FGFR2 ECD+TM construct in  
9 particular, the structure of the ECD lacks both the acid box and the D3 domain. Removal of both  
10 regions increases the affinity for heparin and the ability of FGF to active FGFR (Wang et al.,  
11 1995). The D3 domain is unnecessary for FGF1 activation and is involved in differential  
12 responses to different FGFs (Yu et al., 2000).

13

14           There are many open questions about the structure of FGFRs regarding the  
15 transmembrane helix and how it connects the ECD and KD. There is an NMR structure of the  
16 FGFR3 TM that shows it as a single alpha helix (Bocharov et al., 2013). However, the biological  
17 relevance of this structure is unclear as the data was collected from a construct containing only  
18 the TM and the extracellular juxtamembrane region, without the ECD or KD. As the TM  
19 represents a tiny proportion of the full-length FGFR, it is likely that the natural conformation of  
20 the TM in the intact receptor in vivo differs significantly from the isolated peptide.

21

1 X-ray crystallography of a multi-domain construct containing the TM would provide  
2 more insight into the receptor activation mechanism and how activation status is transduced  
3 across the membrane. Bocharov et al. proposed a “string puppet theory” mechanism of signal  
4 transduction based on the NMR structure of the TM helix (Bocharov et al., 2013). The string  
5 puppet theory proposes that FGFR dimerizes in an inactive form via its transmembrane domains  
6 without FGF and heparin; the active conformation results when the inactive dimer binds to  
7 FGFs. Details of the stoichiometry of FGF, heparin, and FGFR in the activated complex are also  
8 debated (Lemmon & Schlessinger, 2010). Conclusively resolving different hypotheses about  
9 inactive and active FGFR states will come from detailed structures of intact FGFR.

10 Here we describe our development of a recombinant expression system in *E. coli* to  
11 produce significant quantities of functional FGFR with its TM linked to either its ECD or KD for  
12 eventual structural studies. Recombinant expression of complex eukaryotic proteins in *E. coli* is  
13 often challenging and results in low yields of insoluble, inactive protein (Rosano & Ceccarelli,  
14 2014). Expression of membrane proteins containing the very hydrophobic transmembrane  
15 domains is especially problematic (Hattab et al., 2015). Moreover, there have been only a few  
16 studies describing the successful heterologous expression of protein kinases including their  
17 transmembrane domains, with none expressed in *E. coli* (Mi et al., 2008, 2011; Lu et al., 2012;  
18 Paavilainen et al., 2013; Opatowsky et al., 2014; Chen, Unger & He, 2015). These prior studies  
19 describe the recombinant expression of EGFR, EphA2, PDGFR, and Kit. Here, we describe the  
20 expression of constructs of FGFR2 and FGFR3 containing ECD+TM in *E. coli* in sufficient yield  
21 for protein crystallization. FGFR was expressed as a fusion protein with maltose binding protein  
22 (MBP), which has been shown to improve expression yield and solubility (Kapust & Waugh,  
23 1999). We show that the FGFR2 ECD+TM construct is functional in binding heparin and

1 dimerizing. Our simple recombinant method will facilitate biochemical experiments studying the  
2 relationship between the TM and other domains.

3

## 4 **MATERIALS & METHODS**

### 5 **DNA cloning of constructs**

6 PIPE (polymerase incomplete primer extension) cloning was used to obtain specific  
7 domain combinations of FGFR2, and the cloning vector pSpeedET with an N-terminal *E. coli*  
8 maltose binding protein (MBP) fusion tag of 42.5 kDa (Klock & Lesley, 2009). The domain  
9 combinations created are shown in Table 1. The FGFR inserts were amplified by PCR using  
10 Phusion Hi Fidelity DNA Polymerase, 200 mM dNTP, 0.5  $\mu$ M forward and reverse primers, and  
11 6% DMSO. PCR products were extracted from agarose gel and purified using Thermo Scientific  
12 GeneJet Gel Extraction Kits. The MBP fusion tag was added to the construct to improve  
13 construct solubility and expression (Kapust & Waugh, 1999), allow purification by amylose  
14 affinity chromatography, and identification by Western blot with an anti-MBP antibody (New  
15 England Biolabs (E-8038)). Cloning results were confirmed by DNA sequencing.

16

17 **Table 1. FGFR2 and FGFR3 constructs created**

18

| Construct                          | Expected Size (kDa) |
|------------------------------------|---------------------|
| MBP + FGFR2 31-406 (ECD + TM)      | 71.5                |
| MBP + FGFR2 370-651 (TM + KD)      | 73.7                |
| MBP + FGFR2 31-651 (ECD + TM + KD) | 111.5               |

|                                     |       |
|-------------------------------------|-------|
| MBP + FGFR3 143-405 (ECD + TM)      | 71.3  |
| MBP + FGFR3 365-771 (TM + KD)       | 87.9  |
| MBP + FGFR3 143-771 (ECD + TM + KD) | 112.3 |

1

2

### 3 **Small-scale expression**

4           Small scale expression studies were performed using *E. coli* Lemo21 cells (New England  
5 Biolabs). 10 mL inoculate from an overnight culture was added to 100 mL of TB media and  
6 shaken at 37° C. The OD<sub>600</sub> was monitored as it approached an absorbance of 0.6. Once the  
7 culture reached an OD<sub>600</sub> of 0.4-0.5, the cells were cooled to 18° C in the shaker to slow the  
8 growth of cells and 0.5 mM rhamnose was added to a final concentration of 0.5 mM to titrate  
9 expression levels in the Lemo21 cells. Once it reached OD of 0.6, 1 mL of each construct culture  
10 was taken to serve as a negative control for later experiments. Isopropyl β-D-1-  
11 thiogalactopyranoside (IPTG) was then added at a 0.1 mM final concentration to each culture to  
12 induce expression. The cells were then grown in a shaker at 18° C overnight.

13

### 14 **Harvesting and lysing cells**

15           Each of the cultures was centrifuged at 4° C at 4,800 g for 10 minutes. The culture media  
16 was discarded, and the pellet was washed by resuspending in lysis buffer (300 mM NaCl, 50 mM  
17 HEPES at pH 7.5, 0.1 mM MgSO<sub>4</sub>, 5% glycerol, 0.5 mM TCEP, benzamidine, and PMSF). It  
18 was centrifuged at 4,800 g for 10 minutes, after which, the lysis buffer was discarded. 20 mg of  
19 post induction *E. coli* cell pellet was resuspended in 180 μL of lysis buffer (300 mM NaCl, 50  
20 mM HEPES at pH 7.5, 0.1 mM MgSO<sub>4</sub>, 5% glycerol, 0.5 mM TCEP, benzamidine, and PMSF).

1 20  $\mu$ L of 10 mg/mL lysozyme stock was added in addition to 0.3  $\mu$ L of DNase I. Next, the lysis  
2 reaction was put through three freeze-thaw cycles to lyse the cells.

3

#### 4 **Western blot analysis**

5

6 Western blotting was performed on PVDF membranes after wet transfer from  
7 polyacrylamide gels. Membranes were blocked with Amresco RapidBlock solution for 5 minutes  
8 and then incubated with HRP-conjugated anti-MBP monoclonal antibody (New England  
9 Biolabs) overnight at 4° C. Membranes were then washed three times for 5 minutes with 20 mM  
10 Tris-HCl pH 7.5, 150 mM NaCl, and 0.1% Tween 20. Finally, the blots were developed using  
11 the KPL TMB Membrane Peroxidase Substrate System kit.

12

#### 13 **Large-scale expression studies**

14 After the best candidates for continued expression studies were determined, the FGFR2  
15 ECD+TM constructs were expressed at a larger scale. The expression procedures  
16 (transformation and inoculation) are identical except that instead of 10 mL of initial culture (in  
17 LB) to inoculate 100 mL of TB, 100 mL of initial culture was grown and inoculated into 1000  
18 mL of TB.

19 Once the culture reached OD<sub>600</sub> of 0.4-0.5, the cells were cooled to 18° C in the shaker to  
20 slow growth, and rhamnose was added to a final concentration of 0.5 mM to titrate expression  
21 levels in the Lemo21 cells. Isopropyl  $\beta$ -D-1-thiogalactopyranoside (IPTG) was then added at 0.1  
22 mM final concentration to induce expression.

23

#### 24 **Cell lysis**

1 Each construct's cell pellet was resuspended in lysis buffer by vortexing and physically  
2 mixing with a pipet to ensure homogeneity. 1  $\mu$ L of DNase I was added in addition to 1  $\mu$ M  
3 final concentration of  $\text{CaCl}_2$ , and additional protease inhibitors (E-64, pepstatin, and bestatin)  
4 prior to lysis by sonication at 4° C with a Fisher Scientific P-550. Sonication was performed for  
5 a total of 2 minutes, divided into 20 seconds of sonication followed by 40 seconds of rest (total  
6 of 6 minutes of clock time), at 60% of full power. Samples are kept on ice during sonication.  
7 After sonication, the suspensions were centrifuged at 48,400 g for 30 minutes.

8

### 9 **Detergent extraction of FGFR from cell membranes**

10 Unlike the small-scale expression trials, large-scale expression studies included detergent  
11 extraction of FGFR2 from cell membranes. For every 100  $\mu$ g of cell pellet or 100  $\mu$ L of  
12 supernatant, 500  $\mu$ L of lysis buffer with 1% detergent solution was added and resuspended in the  
13 presence of PMSF. The suspension for each was then constantly inverted for 2 hours at 25° C.  
14 The suspensions were then centrifuged at 20,800 g. Both pellet and supernatant were then stored  
15 at -80° C. Several detergents were tested for optimal extraction from the cell pellet and the  
16 supernatant from the centrifugation: 1% n-dodecyl- $\beta$ -D-maltopyranoside (DDM), 1% Brij 35,  
17 and 1% Brij 58 for the samples of pellet and supernatant. FGFR2/3 constructs were tested for  
18 binding to MBP-Trap HP affinity chromatography resin (GE Healthcare).

19

### 20 **Refolding by dialysis**

21 Both FGFR2 and FGFR3 constructs containing ECD+TM were refolded by dialysis as  
22 described previously (Mohammadi, Schlessinger & Hubbard, 1996). The cell pellets were  
23 washed and resuspended with 0.5% guanidinium-HCl and centrifuged at 45,000 g for 20



1 minutes. Next, the pellets were solubilized in dialysis solution #1 (6 M guanidinium-HCl, 0.1%  
2 DDM, 10 mM DTT, and protease inhibitors E-64, benzamidine, PMSF, bestatin, and pepstatin at  
3 a pH of 8.0). To facilitate solubilization, the cell pellet and dialysis solution mixture was warmed  
4 briefly to 40° C and then vortexed at room temperature. The total mixture was about 13 mL. All  
5 13 mL of the solubilized inclusion bodies in the dialysis solution #1 was loaded into a dialysis  
6 membrane. This was placed in a beaker with 700 mL of dialysis solution #2 (25 mM HEPES,  
7 150 mM NaCl, 10% glycerol, and 1 mM L-cysteine at pH 7.5) at 4° C overnight with constant  
8 stirring using a magnetic stir bar. After 19 hours, the sample within the dialysis membrane was  
9 then centrifuged at 24,000 g for 30 minutes and the supernatant was stored at -80° C.

10

### 11 **FGF1 expression and purification**

12 The FGF1 gene with an N-terminal His-tag in the expression vector pMCSG7 was  
13 obtained from the DNASU Plasmid Repository at Arizona State University. FGF1 was first  
14 purified using a 1 mL HiTrap GE Healthcare heparin affinity chromatography column, using  
15 elution buffer containing 1 M NaCl, 10% glycerol, 25 mM HEPES, 10 mM imidazole, and  
16 benzamidine with a pH of 7.5, as described previously (Pellegrini et al., 2000).

17 Successful purification by heparin affinity chromatography was confirmed by SDS-  
18 PAGE and Western blot analysis, but instead of using an anti-MBP antibody (HRP conjugated),  
19 an anti-His antibody (HRP conjugated) from Pierce was used. This was then followed by size  
20 exclusion chromatography on a Superdex 200 10/300 GL column (GE Healthcare). The running  
21 buffer used for size exclusion chromatography (SEC) was 25 mM HEPES, 0.1% DDM, and 150  
22 mM NaCl.

23

## 1 **Initial functionality test of FGFR2**

2           The first step in testing functionality is to determine whether FGFR2 can bind to heparin  
3 and FGF1. The 1 mL HiTrap Heparin Affinity Chromatography (GE Healthcare) column was  
4 used to test for heparin binding. To equilibrate the column, 10 column volumes (CVs) of binding  
5 buffer (150 mM NaCl, 25 mM HEPES pH 7.5, benzamidine, and 0.1% DDM) was loaded with a  
6 syringe. Next 1 mL of FGF1's elution fraction from SEC was loaded onto the column and then  
7 10 CVs of binding buffer. This was followed by FGFR2's supernatant from the dialysis. After  
8 loading, FGFR2 was washed with 5 CVs of binding buffer and eluted with 10 CVs of elution  
9 buffer (25 mM HEPES pH 7.5, 1.5 M NaCl, 0.1% DDM, benzamidine, and PMSF).

10           After chromatography, SDS-PAGE and western blot analysis were performed. The anti-  
11 MBP antibody was used to detect FGFR2, and the anti-His-tag antibody was used to detect  
12 FGF1. After heparin affinity chromatography, we performed size exclusion chromatography to  
13 assess the presence of aggregation, suggesting non-functional protein, or dimers, supporting  
14 functional protein.

15

## 16 **RESULTS**

### 17 **Small-scale expression of FGFR2 and FGFR3 constructs**

18           We performed small-scale expression trials of the FGFR2 and FGFR3 constructs in 100  
19 mL of culture volume to determine which TM-containing construct would likely produce the  
20 highest yield for larger scale expression studies. Initial expression trials of FGFRs in the  
21 Rosetta2(DE3) strain of *E. coli* demonstrated extensive cell death after IPTG induction,  
22 suggesting toxicity of the expressed protein. We were able to express FGFRs and avoid  
23 expression toxicity using *E. coli* strain Lemo21, that contains T7 RNA polymerase that is

1 titratable by rhamnose added to the media, a feature useful for expressing poorly folding  
2 membrane proteins and toxic proteins (Wagner et al., 2008; Schlegel et al., 2012). The western  
3 blot with an anti-MBP antibody showed significant quantities of FGFR2 and FGFR3 ECD+TM  
4 in both the soluble and cell pellet fractions (**Fig. 2**, lanes 2, 4, 7, 9). The intact receptors were not  
5 detected (data not shown). FGFR2 TM+KD was not detected (lanes 3,8), but FGFR3 TM+KD  
6 (lane 10) was found in the cell pellet fraction. We considered the FGFR2 and FGFR3 ECD+TM  
7 constructs (lanes 7 and 9) to be the most promising for larger scale expression studies because of  
8 their superior yield, and the partial recovery of soluble FGFR3 ECD+TM (lane 4). In addition,  
9 for most of the constructs, prominent bands corresponding to the molecular weight of MBP were  
10 observed suggesting significant proteolysis of the fusion protein. This was not considered  
11 problematic as eventual structural studies would require removal of the MBP fusion-tag  
12 downstream of purification.

13

14

15

16

17

18

19

20

21

22

23

24

25

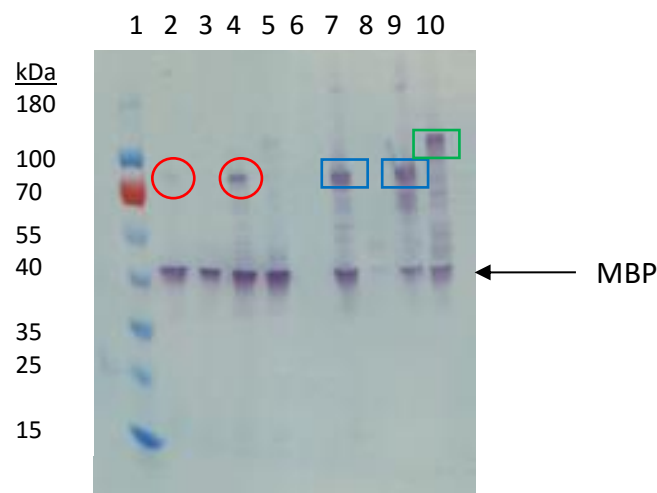

**Fig. 2. Western blot analysis of small-scale expression of FGFR2 and FGFR3 constructs using anti-MBP antibody.** Lane 1: Ladder. Lane 2: FGFR2 31-406 from supernatant. Lane 3: FGFR2 370-651 from supernatant. Lane 4: FGFR3 143-405 from supernatant. Lane 5: FGFR 3: 365-771 from supernatant. Lane 6: Blank. Lane 7: FGFR2 31-406 from pellet. Lane 8: FGFR2 370-651 from pellet. Lane 9: FGFR3 143-405 from pellet. Lane 10: FGFR3 365-771 from pellet. Circled in red are bands consistent with FGFR2 and FGFR3 ECD+TM from supernatant. Boxed

1 in blue are bands consistent with FGFR 2 and 3 ECD+TM from the cell pellet fraction. Boxed in  
2 green is a band consistent with FGFR3 TM+KD from the cell pellet fraction.

3

#### 4 **Large-scale expression studies and detergent extraction analysis**

5 We performed expression trials of the FGFR2 and FGFR3 ECD+TM constructs in larger  
6 scale, 1L cultures of Lemo21 cells. We tested three detergent solutions, containing 1% n-  
7 dodecyl- $\beta$ -D-maltopyranoside (DDM), Brij 35, or Brij 58, for extraction of FGFR2/3 from cells.  
8 The western blot with an anti-MBP antibody on the detergent-extracted fractions showed  
9 significant quantities of FGFR2 and FGFR3 ECD+TM from both the soluble and cell pellet  
10 fractions (**Fig. 3**). We determined that DDM (lanes 2, 3, 8, and 9), Brij 35 (lanes 4, 5, 10, and  
11 11), and Brij 58 (lanes 6, 7, 12, and 13) extracted FGFR2/3 to similar levels. We selected DDM  
12 for all subsequent procedures because it is the most commonly used detergent for membrane  
13 protein crystallography (Privé, 2007; Loll, 2014). As in the small-scale expression trials, we  
14 observed prominent bands corresponding to proteolyzed MBP in the western blots. Due to the  
15 large amounts of protein loaded, we also observed high amounts of non-specific binding in the  
16 western blot. We also observed a high molecular weight band that comigrated near the 180 kDa  
17 ladder band that we tentatively identify as oligomerized or aggregated FGFR2/3.

18 Based on the high expression levels shown on this western blot, especially from the  
19 soluble fraction, we initially decided FGFR3 ECD+TM would be our lead candidate for further  
20 expression and purification studies. However, we found that FGFR3 from the soluble fraction  
21 did not bind to the MBP affinity column. This suggested that the fusion protein, MBP-FGFR3  
22 ECD+TM, was folded incorrectly, despite being soluble. Thus, we refocused efforts on  
23 recovering FGFR2 from the insoluble fractions. We pursued expression of FGFR2 ECD+TM in  
24 inclusion bodies and refolding by dialysis, as demonstrated previously for FGFR2 ECD

1 (Mohammadi, Schlessinger & Hubbard, 1996). Refolding provided high yields of FGFR2  
2 ECD+TM, > 4 mg of purified protein from 1 L of culture. The yield is adequate for protein  
3 crystallization.

4

5

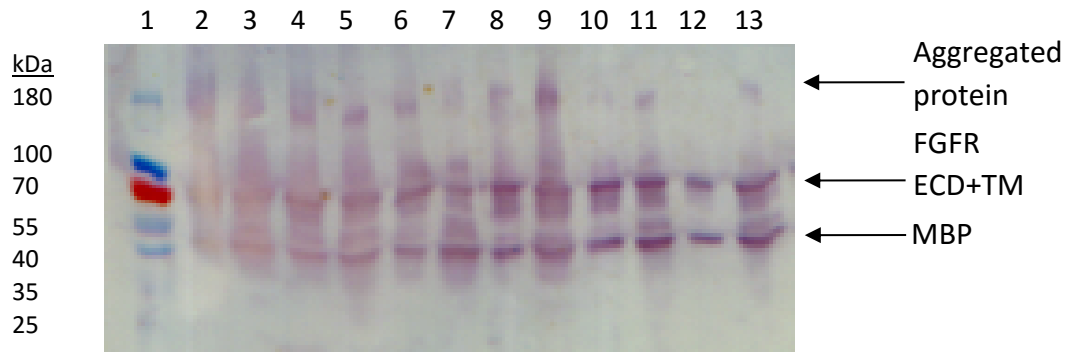

6

7 **Fig. 3. Western blot of detergent extractions of large-scale expression constructs FGFR2**  
8 **and FGFR3 ECD+TM.** Lane 1: Ladder. Lane 2: FGFR2 pellet with 1% DDM. Lane 3: FGFR 2  
9 supernatant with 1% DDM. Lane 4: FGFR2 pellet with 1% Brij 35. Lane 5: FGFR2 supernatant  
10 with 1% Brij 35. Lane 6: FGFR2 pellet with 1% Brij 58. Lane 7: FGFR2 supernatant with 1%  
11 Brij 58. Lane 8: FGFR3 pellet with 1% DDM. Lane 9: FGFR3 supernatant with 1% DDM. Lane  
12 10: FGFR3 pellet with 1% Brij 35. Lane 11: FGFR3 supernatant with Brij 35. Lane 12: FGFR3  
13 pellet with 1% Brij 58. Lane 13: FGFR3 supernatant with 1% Brij 58.

14

15

### 16 **Binding of refolded FGFR2 to heparin**

17 To test that the refolded FGFR2 ECD+TM retained its function, we sought to determine

18 whether it was able to 1) bind heparin, 2) bind FGF1, and 3) dimerize. We tested the refolded

19 fraction for binding to a heparin affinity chromatography column. A western blot with an anti-

20 MBP antibody of the eluted fractions from the heparin affinity column demonstrated the

21 presence of MBP-FGFR2 ECD+TM, supporting that the refolded FGFR2 bound heparin (**Fig. 4**).

22

23

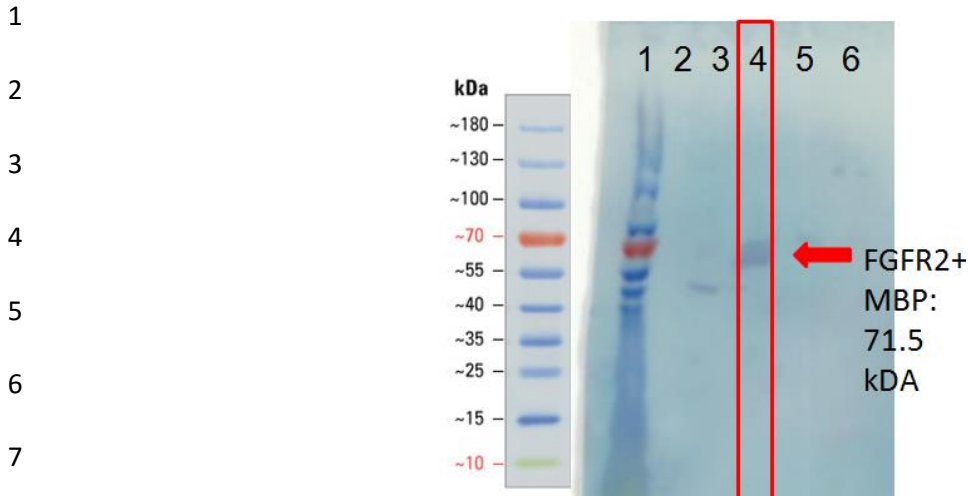

**Fig. 4. Western blot of heparin affinity column purification fractions using anti-MBP antibody.** Lane 1: ladder. Lanes 2-3: wash fractions. Lanes 4-6: elution fractions.

### **Refolded FGFR2 forms dimers but does not bind FGF1**

The main elution fraction from the heparin affinity purification was then passed through a size exclusion chromatography column to resolve its components (**Fig. 5**). The first peak, eluting at 25.76 mL, corresponds to a molecular weight of 200 kDa. The second peak, eluting at 30.79 mL, corresponds to between 66 and 79 kDa. The third primary peak, eluting at 34.99 mL, corresponds to a size between 12 and 20 kDa. Each of these three primary peaks was analyzed by SDS-PAGE and western blots (**Fig. 6**). The second peak corresponded to the molecular weight of the MBP-FGFR2 ECD+TM construct (71.5 kDa) and was identified by western blot with an anti-MBP antibody (data not shown). The third peak corresponded to FGF1 from its molecular weight (17.5 kDa) and was identified by western blot with an anti-His-tag antibody (data not shown).

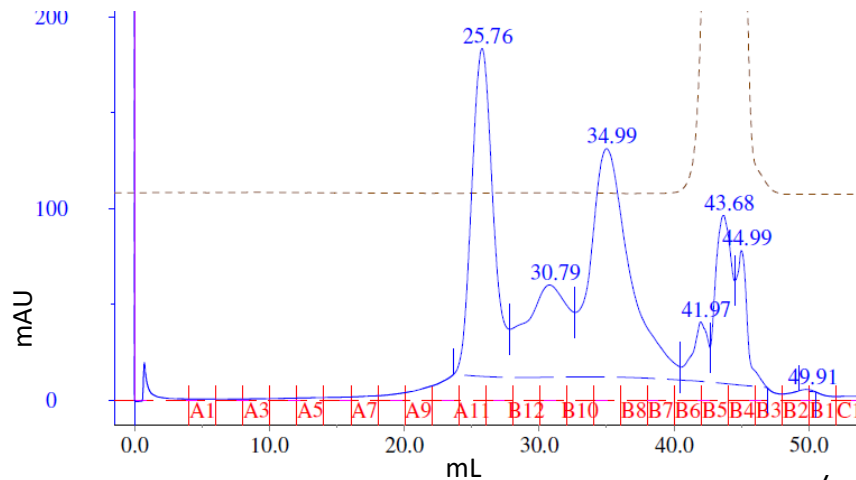

8 **Fig. 5. Size exclusion chromatography of the main heparin affinity elution fraction.**  
9 Elution fractions are marked in red.

10  
11 We considered two possibilities for the identity of the first peak: 1) a complex of MBP-  
12 FGFR2 dimer with FGF1, 2) a dimer of MBP-FGFR2 in DDM micelles. Western blot analysis  
13 with an anti-MBP antibody confirmed the presence of MBP-FGFR2 ECD+TM (**Fig. 6**). We  
14 eliminated the possibility of the peak being the FGFR2-FGF1 complex because the expected  
15 molecular weight is 230.5 kDa, and western blot analysis with an anti-His-tag antibody did not  
16 show the presence of FGF1 (data not shown). In contrast, the expected molecular weight of an  
17 MBP-FGFR ECD-TM dimer with a DDM micelle is 213 kDa. Potentially, the inclusion of the  
18 TM region or DDM may stabilize an inactive conformation of the dimer, rendering it incapable  
19 of binding FGF1. Another possibility is that the MBP fusion-tag interfered with FGF1 binding.

20

21

22

23

24

25

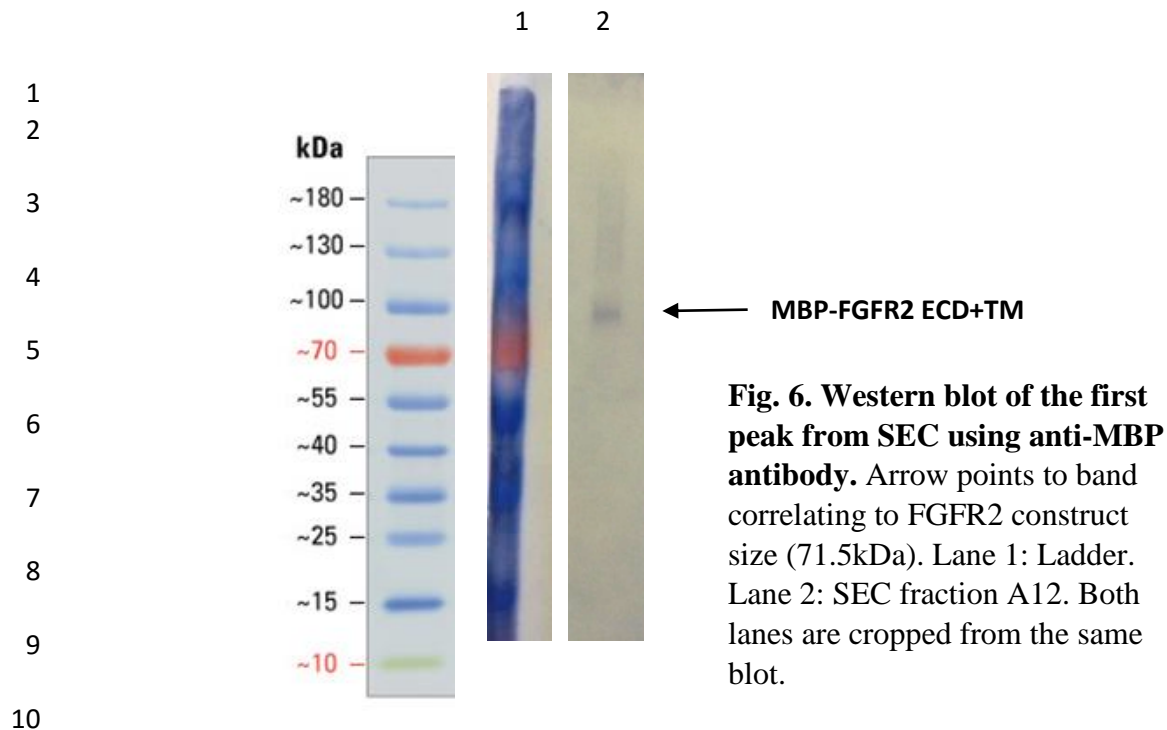

## 11 CONCLUSIONS

12 Our results present progress toward recombinantly expressing partially functional FGFR2  
13 ECD+TM in *E. coli*. This is the first report of recombinant expression in *E. coli* of a eukaryotic  
14 protein kinase construct containing its TM domain. Protein production in *E. coli* is highly  
15 desirable because of low costs, fast growth, easy mutagenesis, and high protein yields. Key steps  
16 include the use of the MBP fusion tag, use of the Lemo21 (DE3) strain, refolding from inclusion  
17 bodies, and use of the detergent DDM throughout all extraction and purification procedures. The  
18 purified FGFR2 ECD+TM demonstrated the ability to dimerize and bind heparin but did not  
19 form a stable complex with FGF1 as observed by size exclusion chromatography. This may  
20 suggest that the purified FGFR2 was not fully folded or functional. Other possible explanations  
21 include 1) inclusion of the TM or detergent favors an inactive conformation, 2) stable complex  
22 formation requires the addition of accessory molecules such as heparin, heparan sulfate, or  
23 sodium octasulfate (Zhang et al., 2009), or 3) the MBP fusion tag interfered with FGF1 binding.  
24 We plan future experiments to address these possibilities. The potential inhibitory role of the TM



1 in FGF binding and receptor activation merits further investigation. Future studies of FGFR and  
2 receptor kinase function should include the TMs in the expressed protein constructs as its  
3 biochemical role is increasingly recognized.

4

## 5 **Funding**

6 This project was funded by NSF CAREER Award 1350555 (H.L.N.), the University of Hawaii at  
7 Manoa, and the University of Hawaii at Manoa Undergraduate Research Opportunities Program  
8 (A.B).

9

## 10 **Competing interests**

11 The authors declare no conflict of interest.

12

## 13 **Author contributions**

- 14 • Adam Bajinting conceived, designed, performed, and analyzed experiments, wrote the paper,  
15 and reviewed drafts of the paper.
- 16 • Ho Leung Ng conceived, designed, and analyzed experiments, wrote the paper, reviewed  
17 drafts of the paper, and supervised the project.

18

## 19 **REFERENCES**

- 20 Bocharov EV., Lesovoy DM., Goncharuk SA., Goncharuk MV., Hristova K., Arseniev AS.  
21 2013. Structure of FGFR3 Transmembrane Domain Dimer: Implications for Signaling  
22 and Human Pathologies. *Structure* 21:2087–2093. DOI: 10.1016/j.str.2013.08.026.

- 1 Brooks AN., Kilgour E., Smith PD. 2012. Molecular Pathways: Fibroblast Growth Factor  
2 Signaling: A New Therapeutic Opportunity in Cancer. *Clinical Cancer Research*  
3 18:1855–1862. DOI: 10.1158/1078-0432.CCR-11-0699.
- 4 Chen P-H., Unger V., He X. 2015. Structure of Full-Length Human PDGFR $\beta$  Bound to Its  
5 Activating Ligand PDGF-B as Determined by Negative-Stain Electron Microscopy.  
6 *Journal of Molecular Biology* 427:3921–3934. DOI: 10.1016/j.jmb.2015.10.003.
- 7 Daniele G., Corral J., Molife LR., Bono JS de. 2012. FGF Receptor Inhibitors: Role in Cancer  
8 Therapy. *Current Oncology Reports* 14:111–119. DOI: 10.1007/s11912-012-0225-0.
- 9 Dieci MV., Arnedos M., Andre F., Soria JC. 2013. Fibroblast Growth Factor Receptor Inhibitors  
10 as a Cancer Treatment: From a Biologic Rationale to Medical Perspectives. *Cancer*  
11 *Discovery* 3:264–279. DOI: 10.1158/2159-8290.CD-12-0362.
- 12 Hattab G., Warschawski DE., Moncoq K., Miroux B. 2015. Escherichia coli as host for  
13 membrane protein structure determination: a global analysis. *Scientific Reports* 5:12097.  
14 DOI: 10.1038/srep12097.
- 15 Kalinina J., Dutta K., Ilghari D., Beenken A., Goetz R., Eliseenkova AV., Cowburn D.,  
16 Mohammadi M. 2012. The alternatively spliced acid box region plays a key role in FGF  
17 receptor autoinhibition. *Structure (London, England: 1993)* 20:77–88. DOI:  
18 10.1016/j.str.2011.10.022.
- 19 Kapust RB., Waugh DS. 1999. Escherichia coli maltose-binding protein is uncommonly  
20 effective at promoting the solubility of polypeptides to which it is fused. *Protein Science:*  
21 *A Publication of the Protein Society* 8:1668–1674. DOI: 10.1110/ps.8.8.1668.

- 1 Klock HE., Lesley SA. 2009. The Polymerase Incomplete Primer Extension (PIPE) method  
2 applied to high-throughput cloning and site-directed mutagenesis. *Methods in Molecular*  
3 *Biology (Clifton, N.J.)* 498:91–103. DOI: 10.1007/978-1-59745-196-3\_6.
- 4 Lemmon MA., Schlessinger J. 2010. Cell Signaling by Receptor Tyrosine Kinases. *Cell*  
5 141:1117–1134. DOI: 10.1016/j.cell.2010.06.011.
- 6 Loll PJ. 2014. Membrane proteins, detergents and crystals: what is the state of the art? *Acta*  
7 *Crystallographica Section F Structural Biology Communications* 70:1576–1583. DOI:  
8 10.1107/S2053230X14025035.
- 9 Lu C., Mi L-Z., Schürpf T., Walz T., Springer TA. 2012. Mechanisms for Kinase-mediated  
10 Dimerization of the Epidermal Growth Factor Receptor. *Journal of Biological Chemistry*  
11 287:38244–38253. DOI: 10.1074/jbc.M112.414391.
- 12 Mi L-Z., Grey MJ., Nishida N., Walz T., Lu C., Springer TA. 2008. Functional and Structural  
13 Stability of the Epidermal Growth Factor Receptor in Detergent Micelles and  
14 Phospholipid Nanodiscs†. *Biochemistry* 47:10314–10323. DOI: 10.1021/bi801006s.
- 15 Mi L-Z., Lu C., Li Z., Nishida N., Walz T., Springer TA. 2011. Simultaneous visualization of the  
16 extracellular and cytoplasmic domains of the epidermal growth factor receptor. *Nature*  
17 *Structural & Molecular Biology* 18:984–989. DOI: 10.1038/nsmb.2092.
- 18 Mohammadi M., Schlessinger J., Hubbard SR. 1996. Structure of the FGF receptor tyrosine  
19 kinase domain reveals a novel autoinhibitory mechanism. *Cell* 86:577–587.
- 20 Opatowsky Y., Lax I., Tomé F., Bleichert F., Unger VM., Schlessinger J. 2014. Structure,  
21 domain organization, and different conformational states of stem cell factor-induced  
22 intact KIT dimers. *Proceedings of the National Academy of Sciences* 111:1772–1777.  
23 DOI: 10.1073/pnas.1323254111.

- 1 Paavilainen S., Grandy D., Karelehto E., Chang E., Susi P., Erdjument-Bromage H., Nikolov D.,  
2 Himanen J. 2013. High-level expression of a full-length Eph receptor. *Protein Expression*  
3 *and Purification* 92:112–118. DOI: 10.1016/j.pep.2013.08.016.
- 4 Patstone G., Maher P. 1996. Copper and calcium binding motifs in the extracellular domains of  
5 fibroblast growth factor receptors. *The Journal of Biological Chemistry* 271:3343–3346.
- 6 Pellegrini L., Burke DF., von Delft F., Mulloy B., Blundell TL. 2000. Crystal structure of  
7 fibroblast growth factor receptor ectodomain bound to ligand and heparin. *Nature*  
8 407:1029–1034. DOI: 10.1038/35039551.
- 9 Plotnikov AN., Hubbard SR., Schlessinger J., Mohammadi M. 2000. Crystal structures of two  
10 FGF-FGFR complexes reveal the determinants of ligand-receptor specificity. *Cell*  
11 101:413–424.
- 12 Plotnikov AN., Schlessinger J., Hubbard SR., Mohammadi M. 1999. Structural Basis for FGF  
13 Receptor Dimerization and Activation. *Cell* 98:641–650. DOI: 10.1016/S0092-  
14 8674(00)80051-3.
- 15 Privé GG. 2007. Detergents for the stabilization and crystallization of membrane proteins.  
16 *Methods* 41:388–397. DOI: 10.1016/j.ymeth.2007.01.007.
- 17 Rosano GL., Ceccarelli EA. 2014. Recombinant protein expression in Escherichia coli: advances  
18 and challenges. *Frontiers in Microbiology* 5:172. DOI: 10.3389/fmicb.2014.00172.
- 19 Sanchez-Heras E., Howell FV., Williams G., Doherty P. 2006. The fibroblast growth factor  
20 receptor acid box is essential for interactions with N-cadherin and all of the major  
21 isoforms of neural cell adhesion molecule. *The Journal of Biological Chemistry*  
22 281:35208–35216. DOI: 10.1074/jbc.M608655200.

- 1 Schlegel S., Löfblom J., Lee C., Hjelm A., Klepsch M., Strous M., Drew D., Slotboom DJ., de  
2 Gier J-W. 2012. Optimizing Membrane Protein Overexpression in the Escherichia coli  
3 strain Lemo21(DE3). *Journal of Molecular Biology* 423:648–659. DOI:  
4 10.1016/j.jmb.2012.07.019.
- 5 Schlessinger J., Plotnikov AN., Ibrahimi OA., Eliseenkova AV., Yeh BK., Yayon A., Linhardt  
6 RJ., Mohammadi M. 2000. Crystal Structure of a Ternary FGF-FGFR-Heparin Complex  
7 Reveals a Dual Role for Heparin in FGFR Binding and Dimerization. *Molecular Cell*  
8 6:743–750. DOI: 10.1016/S1097-2765(00)00073-3.
- 9 Turner N., Grose R. 2010. Fibroblast growth factor signalling: from development to cancer.  
10 *Nature Reviews Cancer* 10:116–129. DOI: 10.1038/nrc2780.
- 11 Wagner S., Klepsch MM., Schlegel S., Appel A., Draheim R., Tarry M., Högbom M., Wijk KJ  
12 van., Slotboom DJ., Persson JO., Gier J-W de. 2008. Tuning Escherichia coli for  
13 membrane protein overexpression. *Proceedings of the National Academy of Sciences*  
14 105:14371–14376. DOI: 10.1073/pnas.0804090105.
- 15 Wang F., Kan M., Yan G., Xu J., McKeenan WL. 1995. Alternately spliced NH2-terminal  
16 immunoglobulin-like Loop I in the ectodomain of the fibroblast growth factor (FGF)  
17 receptor 1 lowers affinity for both heparin and FGF-1. *The Journal of Biological*  
18 *Chemistry* 270:10231–10235.
- 19 Yeh BK., Eliseenkova AV., Plotnikov AN., Green D., Pinnell J., Polat T., Gritli-Linde A.,  
20 Linhardt RJ., Mohammadi M. 2002. Structural Basis for Activation of Fibroblast Growth  
21 Factor Signaling by Sucrose Octasulfate. *Molecular and Cellular Biology* 22:7184–7192.  
22 DOI: 10.1128/MCB.22.20.7184-7192.2002.

- 1 Yu K., Herr AB., Waksman G., Ornitz DM. 2000. Loss of fibroblast growth factor receptor 2  
2 ligand-binding specificity in Apert syndrome. *Proceedings of the National Academy of*  
3 *Sciences of the United States of America* 97:14536–14541. DOI:  
4 10.1073/pnas.97.26.14536.
- 5 Zhang F., Zhang Z., Lin X., Beenken A., Eliseenkova AV., Mohammadi M., Linhardt RJ. 2009.  
6 Compositional Analysis of Heparin/Heparan Sulfate Interacting with Fibroblast Growth  
7 Factor·Fibroblast Growth Factor Receptor Complexes. *Biochemistry* 48:8379–8386.  
8 DOI: 10.1021/bi9006379.
- 9  
10
